# Supplementary material for: The essential functions of KREPB4 are developmentally distinct and required for endonuclease association with editosomes
Source: PubMed Central journal article supplement — RNA. 2017 Nov;23(11):1672–84. doi: 10.1261/rna.062786.117 (PMC5648035; doi:10.1261/rna.062786.117), 2017-11
Supplement: supp_062786.117_Supplemental_Tables_S2_S3.pdf [file supp_062786.117_Supplemental_Tables_S2_S3.pdf]

**Supplemental Table S2.** Oligonucleotide sequences used in this study.

| <b>Primer Description</b>                                                                 | <b>Primer sequence</b>                                  | <b>Reference if applicable</b> |
|-------------------------------------------------------------------------------------------|---------------------------------------------------------|--------------------------------|
| KREPB4 forward primer with <i>attB1</i> site                                              | GGGGACAAGTTTGTACAAAAAAGCAGGCTCCAAAATGTTACGTGTTGAAAACCTG | This study                     |
| KREPB4 reverse primer (plus stop codon) with <i>attB2</i> site                            | GGGGACCACTTTGTACAAGAAAGCTGGGTCCTATTTTTTCTTTGTGGCAAGG    | This study                     |
| KREPB4 reverse primer (no stop codon) with <i>attB2</i> site                              | GGGGACCACTTTGTACAAGAAAGCTGGGCTTTTTTCTTTGTGGCAAGGC       | This study                     |
| Forward primer floxed cassette amplification from SM06 and SM07 (Merritt and Stuart 2013) | GATAAGCTTATAACTTCGTATAGCATACA                           | (Merritt and Stuart 2013)      |
| Reverse primer floxed cassette amplification from SM06 and SM07 (Merritt and Stuart 2013) | GACCCACTTAGGATCCATAACTTCGTA                             | (Merritt and Stuart 2013)      |
| Forward primer blasticidin cassette amplification                                         | ATGGCCAAGCCTTTGTCTCAA                                   | (Merritt and Stuart 2013)      |
| Reverse primer blasticidin cassette amplification                                         | TTAGCCCTCCCACACATAACCA                                  | (Merritt and Stuart 2013)      |
| Forward primer hygromycin cassette amplification                                          | ATGAAAAAGCCTGAACTCACC                                   | (Merritt and Stuart 2013)      |
| Reverse primer hygromycin cassette amplification                                          | CTATTCCTTTGCCCTCGGAC                                    | (Merritt and Stuart 2013)      |
| KREPB4 PF and BF knockout outer 5' fragment forward                                       | CAGGATCAGGAACCACTTC                                     | This study                     |
| KREPB4 PF and BF knockout outer 5' fragment forward nested                                | AATGAAAAGTGTTACCTTGAG                                   | This study                     |
| KREPB4 PF knockout outer 5' fragment reverse                                              | ATACGAAGTTATAAGCTTATCCAGAGTGAACCAAATTATAGC              | This study                     |
| KREPB4 PF knockout inner 5' fragment forward                                              | TTGTACACAACGTTGCGGATG                                   | This study                     |

|                                                            |                                                                                                                                |                                     |
|------------------------------------------------------------|--------------------------------------------------------------------------------------------------------------------------------|-------------------------------------|
| KREPB4 PF knockout inner 5' fragment reverse               | ATACGAAGTTATAAGCTTATCGTTCAAAAACAGATACTGCCTC                                                                                    | This study                          |
| KREPB4 PF knockout outer 3' fragment forward               | TTATGGATCCTAAGTGGGTCTCCGTTCCGTCGTCGCAGCA                                                                                       | This study                          |
| KREPB4 PF and BF knockout outer 3' fragment reverse        | GAGTAGCGAATGCACGTCGT                                                                                                           | This study                          |
| KREPB4 PF and BF knockout outer 3' fragment reverse nested | TGCAACCCCAGCCATACGCTTG                                                                                                         | This study                          |
| KREPB4 PF knockout inner 3' fragment forward               | TTATGGATCCTAAGTGGGTCTCCGCTGTGCGCGTGTG                                                                                          | This study                          |
| KREPB4 PF knockout inner 3' fragment reverse               | AGAAGAACCACCAGCGATG                                                                                                            | This study                          |
| KREPB4 BF knockout 5' fragment blasticidin reverse         | TTGAGACAAAGGCTTGGCCATGTTCAAAAACAGATACTGCCTC                                                                                    | This study                          |
| KREPB4 BF knockout 5' fragment hygromycin reverse          | GGTGAGTTCAGGCTTTTTTCATGTTCAAAAACAGATACTGCCTC                                                                                   | This study                          |
| KREPB4 BF knockout 3' fragment blasticidin forward         | TGGTTATGTGTGGGAGGGCTAAGCGCCTGTGCGCGTGTG                                                                                        | This study                          |
| KREPB4 BF knockout 3' fragment hygromycin forward          | GTCCGAGGGCAAAGGAATAGGCGCCTGTGCGCGTGTG                                                                                          | This study                          |
| KREN1 in situ tagging pMOTag forward                       | AGATGCAACAGGCAAACACCTACTGCGAGCCAAATGGTGTGCGTAAAAATCCCTTCTTTCCACGGGCGTCGCTACCTCTTTTAGGCATCTCGGTTGGTGCGGGTACCGGCCCCCCTCGAG       | This study (Oberholzer et al. 2006) |
| KREN1 in situ tagging pMOTag reverse                       | GAATTCATTCATCACGAACTACGTTAGCAACCGAACAATGACGGATACTGCAGCGAAAAATAACACCCTCCCGTGTATTACCTCATCATCCAAATAATTATGGCGGCCGCTCTAGAACTAGTGGAT | This study (Oberholzer et al. 2006) |
| KREN2 in situ tagging pMOTag forward                       | ACAGCCCCGTTCTCGTTGCTCTGCAGAGGAGGCTGGACGATCAACTTCACGCCTGGGTATTCTGAATTGAAGGACGCACTACTAGTGGCCGAATTAGTTGGTACCGGGCCCCCCTCGAG        | This study (Oberholzer et al. 2006) |
| KREN2 in situ tagging pMOTag reverse                       | CTCCCGCACCCGGTATAAAGTTTGTCAAACAACAACATCTTATCTTACCACACACATACGCAGACTTTGCCAGCCGAAAGTGGGGAATGTAATCATGGCGGCCGCTCTAGAACTAGTGGAT      | This study (Oberholzer et al. 2006) |
| KREN3 in situ tagging pMOTag forward                       | ACAAACCGGAAGGTTGCTGTTGACTTTTGAAGGGACTACTGAGCGTAGGGCGGCCTCGCTACTAGCATGTGTTTTCCGTCGCTAGCACAAATCGGCCGGCGGTACCGGCCCCCCTCGAG        | This study (Oberholzer et al. 2006) |
| KREN3 in situ tagging pMOTag                               | CACTCCACAAAGAGGAAAAACCGAAGCCAAAAGCGCACCGGTGAAAGTATTTCCGAGAAAAGCCAAAGCGCAGGTATAAGCAAACCTCCAATGACGATTGGCGGCCG                    | This study (Oberholzer et al. 2006) |

|                                                                |                                                      |              |
|----------------------------------------------------------------|------------------------------------------------------|--------------|
| reverse                                                        | TCTAGAACTAGTGGAT                                     | et al. 2006) |
| KREP4 G163V site-directed mutagenesis                          | GAATTATATGTTCTGCTCGAAAGCTTTGCGCGGC                   | This study   |
| KREP4 G163V site-directed mutagenesis                          | GCCGCGCAAAGCTTTGACCAGGAACATATAATTC                   | This study   |
| KREP4 G163R site-directed mutagenesis                          | CCGCGCAAAGCTTTGCGCAGGAACATATAATTCA                   | This study   |
| KREP4 G163R site-directed mutagenesis                          | TGAATTATATGTTCTGCGCGAAAGCTTTGCGCGG                   | This study   |
| KREP4 E164A site-directed mutagenesis                          | TATGTTCTGGGCGCAAGCTTTGCGCGGC                         | This study   |
| KREP4 E164A site-directed mutagenesis                          | GCCGCGCAAAGCTTGGCGCCAGGAACATA                        | This study   |
| KREP4 T280A site-directed mutagenesis                          | GTTCTCCATTACGTGTGCGCCAAGCACATTGAGGA                  | This study   |
| KREP4 T280A site-directed mutagenesis                          | TCCTCAATGTGCTTGGCGCACACGTAATGGAGAAC                  | This study   |
| KREP4 E284A site-directed mutagenesis                          | TGGCACACACGTAATGGCGAACATCATAGGCGAAC                  | This study   |
| KREP4 E284A site-directed mutagenesis                          | GTTGCGCTATGATGTTGCGCCATTACGTGTGTGCCA                 | This study   |
| KREP4 H281A site-directed mutagenesis                          | GTCCTCAATGTGCTTGGCACAGCCGTAATGGAGAACATC              | This study   |
| KREP4 H281A site-directed mutagenesis                          | GATGTTCTCCATTACGGCTGTGCCAAGCACATTGAGGAC              | This study   |
| KREP4 PUF-triple (T280A/H281A/E284A) site-directed mutagenesis | GTCCTCAATGTGCTTGGCGCAGCCGTAATGGCGAACATCATAGGCGAACT   | This study   |
| KREP4 PUF-triple (T280A/H281A/E284A) site-directed mutagenesis | AGTTCGCGCTATGATGTTGCGCCATTACGGCTGCGCCAAGCACATTGAGGAC | This study   |
| KREP4 S153A site-directed mutagenesis                          | AATTCACAAAGCTATCTGCCTCCACCGTAAGCGATAC                | This study   |

|                                                        |                                                              |            |
|--------------------------------------------------------|--------------------------------------------------------------|------------|
| KREPB4 S153A<br>site-directed<br>mutagenesis           | GTATCGCTTACGGTGGAGGCAGATAGCTTTGTGAATT                        | This study |
| KREPB4 S153E<br>site-directed<br>mutagenesis           | AACATATAATTCACAAAGCTATCCTCCTCCACCGTAAGCGATACCTCGG            | This study |
| KREPB4 S153E<br>site-directed<br>mutagenesis           | CCGAGGTATCGCTTACGGTGGAGGAGGATAGCTTTGTGAATTATATGTT            | This study |
| KREPB4 S218A<br>site-directed<br>mutagenesis           | CGACGCCTTATCGTCGGAAGCGTCACCATTTAAAACCATT                     | This study |
| KREPB4 S218A<br>site-directed<br>mutagenesis           | AATGGTTTTAAATGGTGACGCTTCCGACGATAAGGCGTCG                     | This study |
| KREPB4 S219A<br>site-directed<br>mutagenesis           | CGCCTTATCGTCGGCACTGTCACCATTTAAAACCATTTTACG                   | This study |
| KREPB4 S219A<br>site-directed<br>mutagenesis           | CGTAAATGGTTTTAAATGGTGACAGTGCCGACGATAAGGCG                    | This study |
| KREPB4 S218A<br>S219A site-<br>directed<br>mutagenesis | CAGCCGACGCCTTATCGTCGGCAGCGTCACCATTTAAAACCATTTT               | This study |
| KREPB4 S218A<br>S219A site-<br>directed<br>mutagenesis | AAAATGGTTTTAAATGGTGACGCTGCCGACGATAAGGCGTCGGCTG               | This study |
| KREPB4 S224A<br>site-directed<br>mutagenesis           | CCACCATCAGCCGCCGCTTATCGTCG                                   | This study |
| KREPB4 S224A<br>site-directed<br>mutagenesis           | CGACGATAAGGCGGGCTGATGGTGG                                    | This study |
| KREPB4 S218E<br>site-directed<br>mutagenesis           | CAGCCGACGCCTTATCGTCGGACTCGTCACCATTTAAAACCATTTTA              | This study |
| KREPB4 S218E<br>site-directed<br>mutagenesis           | TAAAATGGTTTTAAATGGTGACGAGTCCGACGATAAGGCGTCGGCTG              | This study |
| KREPB4 S219E<br>site-directed<br>mutagenesis           | ATCAGCCGACGCCTTATCGTCCTCACTGTCACCATTTAAAACCAT                | This study |
| KREPB4 S219E<br>site-directed<br>mutagenesis           | ATGGTTTTAAATGGTGACAGTGAGGACGATAAGGCGTCGGCTGAT                | This study |
| KREPB4 S218E<br>S219E site-<br>directed<br>mutagenesis | GCCACCATCAGCCGACGCCTTATCGTCCTCCTCGTCACCATTTAAAACCATTTTACGCAT | This study |
| KREPB4 S218E<br>S219E site-                            | ATGCGTAAAATGGTTTTAAATGGTGACGAGGAGGACGATAAGGCGTCGGCTGATGGTGCC | This study |

|                                                                 |                                |                         |
|-----------------------------------------------------------------|--------------------------------|-------------------------|
| directed mutagenesis                                            |                                |                         |
| KREPB4 S224E site-directed mutagenesis                          | CGCCACCATCAGCCTCCGCCTTATCGTCGG | This study              |
| KREPB4 S224E site-directed mutagenesis                          | CCGACGATAAGGCGGAGGCTGATGGTGGCG | This study              |
| KREPB4 ORF BioMark forward                                      | TCACCACAGTGTTACGCCATACT        | This study              |
| KREPB4 ORF BioMark reverse                                      | ATGTGCTTGGCACACACGTAATGG       | This study              |
| KREPB4 regulatable copy BioMark forward                         | CTAACGGTTCCGAATCCAGTG          | This study              |
| KREPB4 regulatable copy BioMark reverse (aldolase 3'UTR pLEW79) | GCTGTGCCATCAGATTACTCCG         | (Wang et al. 2003)      |
| V5 tag exclusive expressor BioMark forward                      | CCTCGGTCTCGATTCTACGC           | (McDermott et al. 2015) |
| V5 tag exclusive expressor BioMark reverse                      | TGGGGATGGGCTTACCCAG            | (McDermott et al. 2015) |
| COI BioMark forward                                             | CCCGATATGGTATTTCTCGTATAAA      | (Carnes et al. 2008)    |
| COI BioMark reverse                                             | CCCCCATACCCTCTTCAGTCA          | (Carnes et al. 2008)    |
| ND4 BioMark forward                                             | CAATCTGACCATTCCATGTGTGA        | (Carnes et al. 2005)    |
| ND4 BioMark reverse                                             | TTTCAGCACAATACTTGCTAATAAAAACA  | (Carnes et al. 2005)    |
| A6 BioMark pre-edited forward                                   | TTGCCTTTGCCAAACTTTTAGAAG       | (Carnes et al. 2005)    |
| A6 BioMark pre-edited reverse                                   | ATTCTATAACTCCAAAATCACAACCTTCC  | (Carnes et al. 2005)    |
| CYb BioMark pre-edited forward                                  | ATATAAAAGCGGAGAAAAAGAAAG       | (Carnes et al. 2005)    |
| CYb BioMark pre-edited reverse                                  | CCCATATATTCTATATAAACACCTGACA   | (Carnes et al. 2005)    |
| COII BioMark pre-edited forward                                 | ATTACAGTGTAACCATGTATTGACATT    | (Carnes et al. 2005)    |
| COII BioMark pre-edited reverse                                 | TTCATTACACCTACCAGGTTCTCT       | (Carnes et al. 2005)    |
| COIII BioMark pre-edited forward                                | GAAACCAGATGAGATTGTTTGCA        | (Carnes et al. 2005)    |

|                                  |                                 |                      |
|----------------------------------|---------------------------------|----------------------|
| COIII BioMark pre-edited reverse | TTCATTCCAACCTAAACCCTTTCC        | (Carnes et al. 2005) |
| MURF2 BioMark pre-edited forward | GATTTTAAGATTGGCTTTGATTGA        | (Carnes et al. 2005) |
| MURF2 BioMark pre-edited reverse | AATATAAAATCTAGATCAAACCATCACA    | (Carnes et al. 2005) |
| RPS12 BioMark pre-edited forward | CGACGGAGAGCTTCTTTTGAATA         | (Carnes et al. 2005) |
| RPS12 BioMark pre-edited reverse | CCCCCACCCAAATCTTT               | (Carnes et al. 2005) |
| ND3 BioMark pre-edited forward   | GAATGGGAGATGGGTTTTGG            | (Carnes et al. 2005) |
| ND3 BioMark pre-edited reverse   | AACAAATCTCTTTACCCCCTTCAG        | (Carnes et al. 2005) |
| ND7 BioMark pre-edited forward   | GCGGGCGGAGCATTATT               | (Carnes et al. 2005) |
| ND7 BioMark pre-edited reverse   | GATCTACGGTCCCCTCTTTCCT          | (Carnes et al. 2005) |
| A6 BioMark edited forward        | GATTTATTTTGGTTGCGTTTGTTATTATG   | (Carnes et al. 2005) |
| A6 BioMark edited reverse        | CAAACCAACAACAAATACAAATCAAAC     | (Carnes et al. 2005) |
| CYb BioMark edited forward       | AAATATGTTTCGTTGTAGATTTTTATTATTT | (Carnes et al. 2005) |
| CYb BioMark edited reverse       | CCCATATATTCTATATAAACCAACCTGACA  | (Carnes et al. 2005) |
| COII BioMark edited forward      | ATTACAGTGTAACCATGTATTGACATT     | (Carnes et al. 2005) |
| COII BioMark edited reverse      | ATTTCATTACACCTACCAGGTATACAA     | (Carnes et al. 2005) |
| COIII BioMark edited forward     | TTGTGTTTTATTACGTTGTATCCAGTATTG  | (Carnes et al. 2005) |
| COIII BioMark edited reverse     | CGAAAGCAAACCTCACAACACAAA        | (Carnes et al. 2005) |
| MURF2 BioMark edited forward     | GATTTTAATGTTTGGTTGTTTAAATTTAG   | (Carnes et al. 2005) |
| MURF2 BioMark edited reverse     | AATATAAAATCTAGATCAAACCATCACA    | (Carnes et al. 2005) |
| RPS12 BioMark edited forward     | CGTATGTGATTTTTGTATGGTTGTTG      | (Carnes et al. 2005) |
| RPS12 BioMark edited reverse     | ACACGTCGGTTACCGGAACT            | (Carnes et al. 2005) |
| ND3 BioMark edited forward       | TGTTTTCGTTGTTGTTTGTGGTT         | (Carnes et al. 2005) |
| ND3 BioMark edited reverse       | CAATGTATAAACACCAAACGTGAATT      | (Carnes et al. 2005) |

|                            |                              |                      |
|----------------------------|------------------------------|----------------------|
| ND7 BioMark edited forward | GCATCCCGCAGCACATG            | (Carnes et al. 2005) |
| ND7 BioMark edited reverse | CTGTACCACGATGCAAATAACCTATAAT | (Carnes et al. 2005) |

### Supplemental Table S3. Antibodies used in this study.

| Antibody name                      | Raised in | Dilution                                                | Source                                  |
|------------------------------------|-----------|---------------------------------------------------------|-----------------------------------------|
| V5 Epitope Tag Polyclonal Antibody | Rabbit    | 1 µg per IP with 1 × 10 <sup>8</sup> cells<br>1/5000 WB | Rockland Immunochemicals<br>600-401-378 |
| V5 Epitope Tag Monoclonal Antibody | Mouse     | 1 µg per IP with 1 × 10 <sup>8</sup> cells<br>1/5000 WB | Life Technologies<br>R960-25            |
| c-Myc (9E10) Monoclonal Antibody   | Mouse     | 1/200 WB                                                | Santa Cruz<br>sc-40                     |
| c-Myc (A-14) Polyclonal Antibody   | Rabbit    | 1/200 WB                                                | Santa Cruz<br>sc-789                    |
| KREPA1 Monoclonal Antibody         | Mouse     | 1/25 WB                                                 | (Panigrahi et al. 2001)<br>P4D8-F6      |
| KREPA2 Monoclonal Antibody         | Mouse     | 1 mL per IP with 1 × 10 <sup>8</sup> cells<br>1/12.5 WB | (Panigrahi et al. 2001)<br>P1H3-D7      |
| KREL1 Monoclonal Antibody          | Mouse     | 1/50 WB                                                 | (Panigrahi et al. 2001)<br>P3C1-G2      |
| KREPA3 Monoclonal Antibody         | Mouse     | 1/25 WB                                                 | (Panigrahi et al. 2001)<br>P3C12-B6     |
| KREPA6 Polyclonal Antibody         | Rabbit    | 1/2000 WB                                               | (Schnauffer et al. 2003)                |
| GAP2 Monoclonal Antibody           | Mouse     | 1/25 WB                                                 | (Allen et al. 1998)<br>mAb53            |
| mtHsp70 Monoclonal Antibody        | Mouse     | 1/1000 WB                                               | (Allen et al. 1998)<br>mAb78            |

### Supplemental References

Allen TE, Heidmann S, Reed R, Myler PJ, Goring HU, Stuart KD. 1998. Association of guide RNA binding protein gBP21 with active RNA editing complexes in *Trypanosoma brucei*. *Molecular and cellular biology* **18**: 6014-6022.

Carnes J, Trotter JR, Ernst NL, Steinberg A, Stuart K. 2005. An essential RNase III insertion editing endonuclease in *Trypanosoma brucei*. *Proceedings of the National Academy of Sciences of the United States of America* **102**: 16614-16619.

Carnes J, Trotter JR, Peltan A, Fleck M, Stuart K. 2008. RNA editing in *Trypanosoma brucei* requires three different editosomes. *Molecular and cellular biology* **28**: 122-130.

- McDermott SM, Guo X, Carnes J, Stuart K. 2015. Differential Editosome Protein Function between Life Cycle Stages of *Trypanosoma brucei*. *The Journal of biological chemistry* **290**: 24914-24931.
- Merritt C, Stuart K. 2013. Identification of essential and non-essential protein kinases by a fusion PCR method for efficient production of transgenic *Trypanosoma brucei*. *Molecular and biochemical parasitology* **190**: 44-49.
- Oberholzer M, Morand S, Kunz S, Seebeck T. 2006. A vector series for rapid PCR-mediated C-terminal in situ tagging of *Trypanosoma brucei* genes. *Molecular and biochemical parasitology* **145**: 117-120.
- Panigrahi AK, Gygi SP, Ernst NL, Igo RP, Jr., Palazzo SS, Schnauffer A, Weston DS, Carmean N, Salavati R, Aebersold R et al. 2001. Association of two novel proteins, TbMP52 and TbMP48, with the *Trypanosoma brucei* RNA editing complex. *Molecular and cellular biology* **21**: 380-389.
- Schnauffer A, Ernst NL, Palazzo SS, O'Rear J, Salavati R, Stuart K. 2003. Separate insertion and deletion subcomplexes of the *Trypanosoma brucei* RNA editing complex. *Molecular cell* **12**: 307-319.
- Wang B, Ernst NL, Palazzo SS, Panigrahi AK, Salavati R, Stuart K. 2003. TbMP44 is essential for RNA editing and structural integrity of the editosome in *Trypanosoma brucei*. *Eukaryotic cell* **2**: 578-587.
